# Supplementary material for: ATP Production Relies on Fatty Acid Oxidation Rather than Glycolysis in Pancreatic Ductal Adenocarcinoma
Source: PubMed Central journal article supplement (PMC7564784; doi:10.3390/cancers12092477), 2020-09-01
Supplement: cancers-12-02477-s001.pdf [file cancers-12-02477-s001.pdf]

*Supplementary Material*

# **ATP Production Relies on Fatty Acid Oxidation Rather than Glycolysis in Pancreatic Ductal Adenocarcinoma**

**Jae-Seon Lee, Su-Jin Oh, Hyun-Jung Choi, Joon Hee Kang, Seon-Hyeong Lee, Ji Sun Ha, Sang Myung Woo, Hyonchol Jang, Ho Lee, and Soo-Youl Kim**

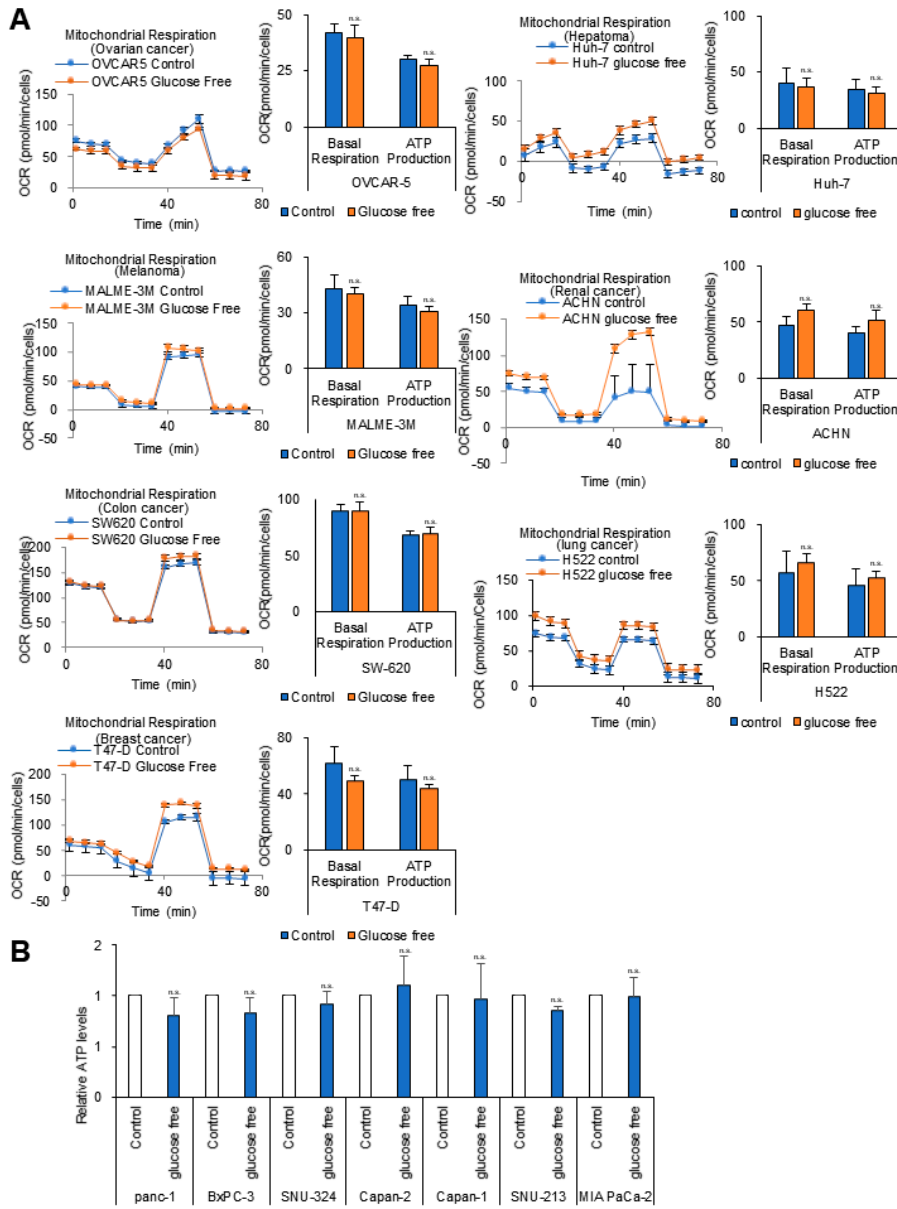

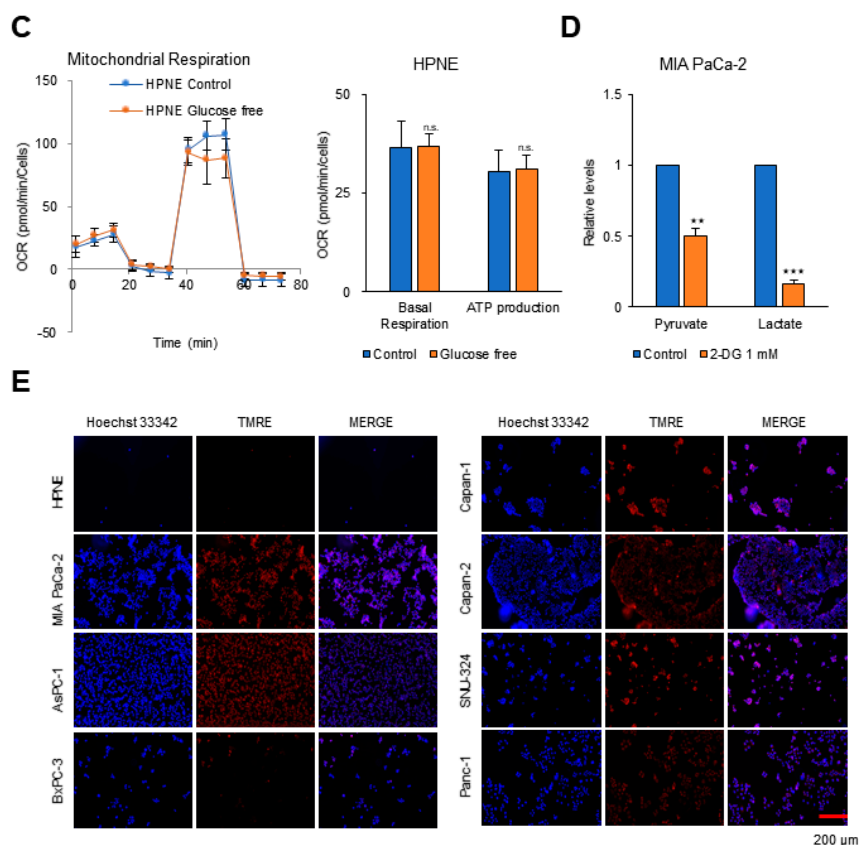

**Figure S1.** Glucose deprivation was not able to affect basal consumption rate and ATP production. (A) Seahorse XF analysis of various other cancer cells (Ovarian, Melanoma, Colon, Breast, Hepatoma, Renal, Lung cancer cells) treated sequentially with oligomycin, the chemical uncoupler FCCP, and antimycin A/ Rotenone. The oxygen consumption rate (OCR) was analysed using the Seahorse XFe analyzer in normal condition media compared to glucose deprivation media. (B) ATP levels were measured using an ATP Colorimetric/Fluorometric Assay kit after PDAC cells were incubated with glucose free media for 24 h. (C) Seahorse XF analysis of HPNE cells treated sequentially with oligomycin, the chemical uncoupler FCCP and antimycin A/Rotenone. The oxygen consumption rate was determined using the Seahorse XF96 analyzer in normal medium compared with glucose deprivation medium. (D) Pyruvate and lactate were measured by targeted LC-MS/MS after MIA PaCa-2 cells were treated with 2-DG 1 mM for 24 h. (E) Mitochondrial membrane potential of pancreatic cancer cell lines and HPNE was determined by TMRE staining and live cell imaging. Scale bar = 200 μm. n.s. (not significant), \*  $p < 0.05$ , \*\*  $p < 0.01$ , \*\*\*  $p < 0.001$ .

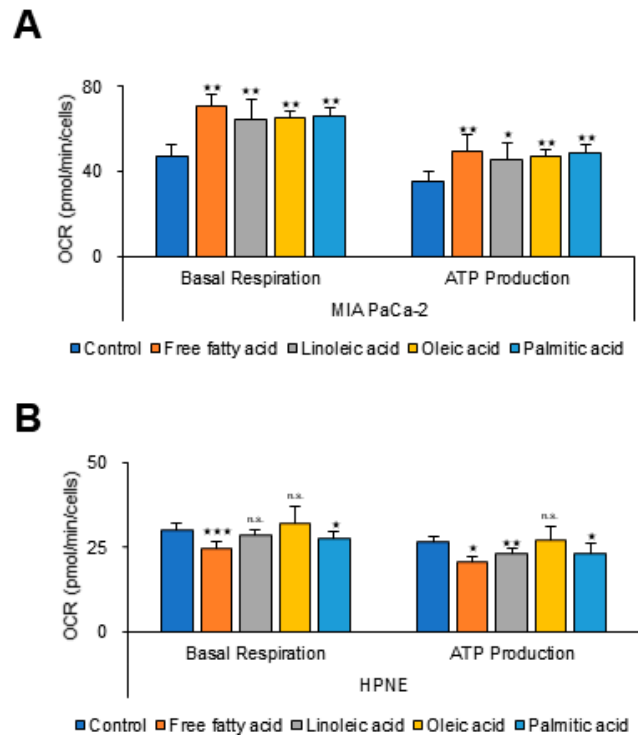

**Figure S2.** Effect of supplementary fatty acids on basal respiration and ATP production in PDAC and normal cells. **(A and B)** To determine whether fatty acids such as linoleic acid (grey), oleic acid (yellow), and palmitic acid (light blue) induce ATP production through FAO, **(A)** PDAC cells and **(B)** normal HPNE cells were treated with supplementary fatty acids under normal culture conditions. The oxygen consumption rate (OCR) was analysed using the Seahorse XFe analyzer. Basal respiration and ATP Production levels in MIA PaCa-2 and HPNE Cells for supplementary fatty acids. n.s. (not significant), \*  $p < 0.05$ , \*\*  $p < 0.01$ , \*\*\*  $p < 0.001$ .

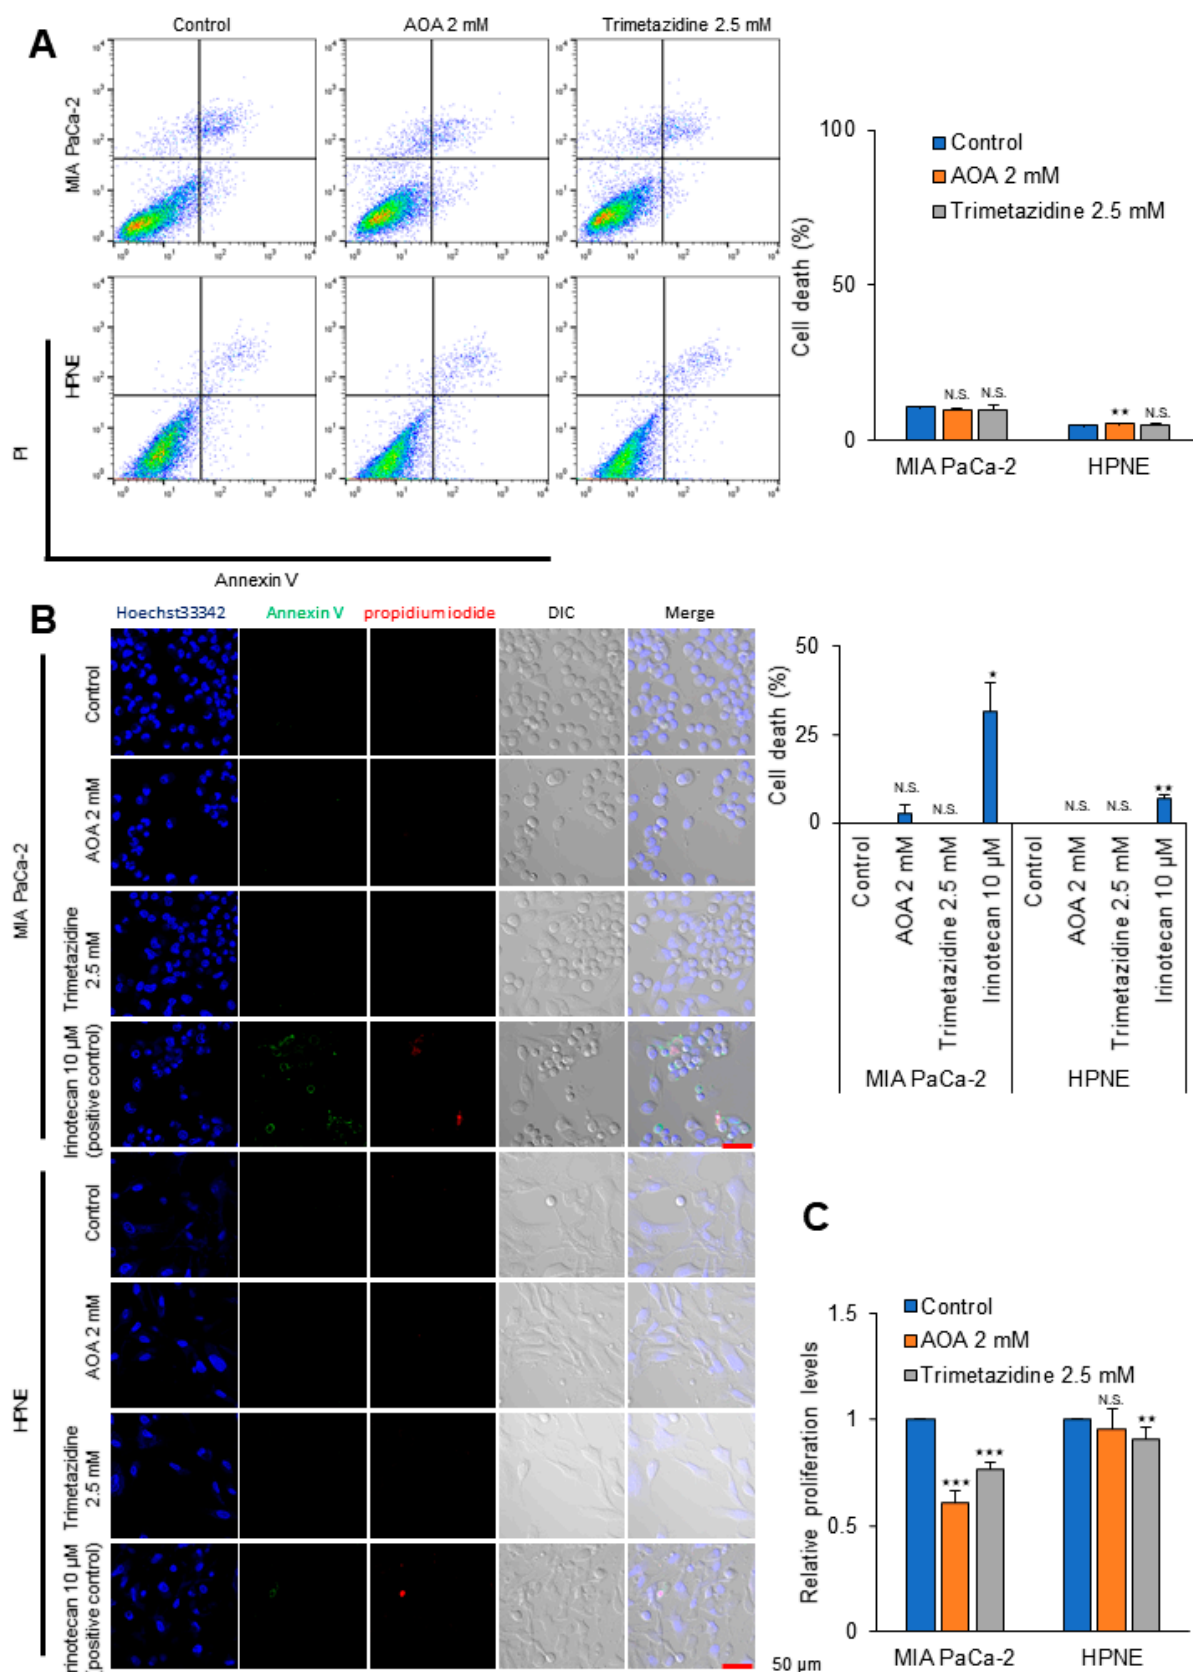

**Figure S3.** Effect of inhibition of MAS and FAO on cell proliferation and cell death. **(A and B)** Cell death analysis using annexin V cell death detection kit was performed with MIA PaCa-2 and normal HPNE cells after inhibitors treatment of aminoxyacetic acid (AOA; malate-aspartate shuttle inhibitor) or trimetazidine (fatty acid oxidation inhibitor) or irinotecan (positive control for cell death) for 24 h. **(A)** Cell death was analyzed by the Flow cytometry and **(B)** confocal microscope. Cell death

was not observed by treatment of AOA or trimetazidine both in MIA PaCa-2 and HPNE while it was observed by treatment of irinotecan. (C) Cell proliferation was measured using SRB assay after MIA PaCa-2 and HPNE cells were treated with AOA or trimetazidine for 24 h. Treatment of AOA and trimetazidine down regulated cell proliferation of MIA PaCa-2 but did not reduce the growth of HPNE. Scale bar = 50  $\mu$ m. N.S. (not significant), \*  $p < 0.05$ , \*\*  $p < 0.01$ , \*\*\*  $p < 0.001$ .

**Table S1.** Formula of High-Fat Diet and Low-Fat Diet.

|                                      | HFD    |       | HFD Control<br>(High Fat Diet) |       | LFD Control<br>(Low Fat Diet) |       | LFD  |       |
|--------------------------------------|--------|-------|--------------------------------|-------|-------------------------------|-------|------|-------|
|                                      | gm%    | kcal% | gm%                            | kcal% | gm%                           | kcal% | gm%  | kcal% |
| Protein                              | 26.2   | 20    | 19.2                           | 20    | 20.3                          | 20.8  | 20.3 | 22.2  |
| Carbohydrate                         | 26.3   | 20    | 67.3                           | 70    | 66.0                          | 67.7  | 71.0 | 77.8  |
| Fat                                  | 34.9   | 60    | 4.3                            | 10    | 5.0                           | 11.5  | 0.0  | 0.0   |
| Total                                | -      | 100   | -                              | 100   | -                             | 100.0 | -    | 100.0 |
| Kcal/gm                              | 5.24   | -     | 3.85                           | -     | 3.90                          | -     | 3.65 | -     |
| Ingredient                           | gm     | kcal  | gm                             | kcal  | gm                            | kcal  | gm   | kcal  |
| Casein, 30 Mesh                      | 200    | 800   | 200                            | 800   | 200                           | 800   | 200  | 800   |
| L-Cystine                            | 3      | 12    | 3                              | 12    | -                             | -     | -    | -     |
| DL-Methionine                        | -      | -     | -                              | -     | 3                             | 12    | 3    | 12    |
| Corn Starch                          | 0      | 0     | 315                            | 1260  | 150                           | 600   | 0    | 0     |
| Sucrose                              | 68.8   | 275.2 | 350                            | 1400  | 500                           | 2000  | 700  | 2800  |
| Maltodextrin 10                      | 125    | 500   | 35                             | 140   | -                             | -     | -    | -     |
| Cellulose, BW200                     | 50     | 0     | 50                             | 0     | 50                            | 0     | 50   | 0     |
| Corn oil                             | -      | -     | -                              | -     | 50                            | 450   | 0    | 0     |
| Soybean Oil                          | 25     | 225   | 25                             | 225   | -                             | -     | -    | -     |
| Lard                                 | 245    | 2205  | 20                             | 180   | -                             | -     | -    | -     |
| Mineral Mix S10001                   | 10     | 0     | 10                             | 0     | 35                            | 0     | 35   | 0     |
| Vitamin Mix V10001                   | 10     | 40    | 10                             | 40    | 10                            | 40    | 10   | 40    |
| Choline Bitartrate                   | 2      | 0     | 2                              | 0     | 2                             | 0     | 2    | 0     |
| Dicalcium Phosphate                  | 13     | 0     | 13                             | 0     | -                             | -     | -    | -     |
| Calcium Carbonate                    | 5.5    | 0     | 5.5                            | 0     | -                             | -     | -    | -     |
| Potassium Citrate, 1H <sub>2</sub> O | 16.5   | 0     | 16.5                           | 0     | -                             | -     | -    | -     |
| FD&C Blue Dye #1                     | 0.05   | 0     | -                              | -     | -                             | -     | -    | -     |
| FD&C Yellow Dye #5                   | -      | -     | 0.05                           | 0     | -                             | -     | -    | -     |
| Total                                | 773.85 | 4057  | 1055.05                        | 4057  | 1000                          | 3902  | 1000 | 3652  |

\*HFD: High Fat Diet; LFD: Low Fat Diet

**Table S2.** Alterations of genes in pancreatic cancer cell lines.

| Cell line | Abnormalities of p16 gene | Abnormalities of p53 gene | Abnormalities of K-ras gene |
|-----------|---------------------------|---------------------------|-----------------------------|
|-----------|---------------------------|---------------------------|-----------------------------|

|            | Codon | a.a change | Codon | a.a change | Codon | a.a change |
|------------|-------|------------|-------|------------|-------|------------|
| SNU-213    |       | wt         | 175   | Arg - His  | 12    | Gly - Val  |
| SNU-324    | 22    | Ala - Val  |       | wt         |       | wt         |
| MIA PaCa-2 |       | null       | 248   | Arg - Trp  | 12    | Gly - Cys  |
| Panc-1     |       | null       | 273   | Arg - His  | 12    | Gly - Asp  |
| BxPC-3     |       | null       | 220   | Tyr-Cys    |       | wt         |
| Capan-1    |       | wt         | 159   | Ala - Val  | 12    | Gly - Val  |
| Capan-2    |       | wt         |       | wt         | 12    | Gly - Val  |
